# Supplementary material for: Feasibility and Acceptability of Fear-Less: A Stepped-Care Program to Manage Fear of Cancer Recurrence in People with Metastatic Melanoma
Source: J Clin Med. 2020 Sep 14;9(9):2969. doi: 10.3390/jcm9092969 (PMC7565154; doi:10.3390/jcm9092969)
Supplement: Supplementary file 1 [file jcm-09-02969-s001.pdf]

# THE PATIENT EXPERIENCE SURVEY

## FEAR-LESS SCREENING QUESTIONNAIRES

Thank you for agreeing to participate in this survey about the *Fear-Less* Program. This survey focuses on your experiences of completing the program's screening questionnaires.

The survey may take up to 5 minutes of your time.

Your responses are confidential, and you don't need to answer any questions if you don't want to.

|                                                                                                                                                                                                                                                                                                                                                                          |  |  |  |  |
|--------------------------------------------------------------------------------------------------------------------------------------------------------------------------------------------------------------------------------------------------------------------------------------------------------------------------------------------------------------------------|--|--|--|--|
| Date: ____/____/____                                                                                                                                                                                                                                                                                                                                                     |  |  |  |  |
| <b>1. What format did you use to complete the screening questionnaires?</b><br><input type="checkbox"/> <sub>1</sub> In person <input type="checkbox"/> <sub>2</sub> Phone <input type="checkbox"/> <sub>3</sub> Online (via email link) <input type="checkbox"/> <sub>4</sub> Returned by mail                                                                          |  |  |  |  |
| <b>2. Were the reasons &amp; procedures for completing the screening questionnaires well-explained?</b><br><input type="checkbox"/> <sub>1</sub> No <input type="checkbox"/> <sub>2</sub> Yes                                                                                                                                                                            |  |  |  |  |
| <b>3. The screening questionnaires procedures were <u>easy to complete</u>.</b><br><div><input type="checkbox"/><sub>1</sub> Strongly disagree    <input type="checkbox"/><sub>2</sub> Disagree    <input type="checkbox"/><sub>3</sub> Don't know    <input type="checkbox"/><sub>4</sub> Agree    <input type="checkbox"/><sub>5</sub> Strongly Agree</div>            |  |  |  |  |
| <b>4. The screening questionnaires procedures were <u>easy to understand</u>.</b><br><div><input type="checkbox"/><sub>1</sub> Strongly disagree    <input type="checkbox"/><sub>2</sub> Disagree    <input type="checkbox"/><sub>3</sub> Don't know    <input type="checkbox"/><sub>4</sub> Agree    <input type="checkbox"/><sub>5</sub> Strongly Agree</div>          |  |  |  |  |
| <b>5. The <u>time</u> it took to complete the screening questionnaires was acceptable.</b><br><div><input type="checkbox"/><sub>1</sub> Strongly disagree    <input type="checkbox"/><sub>2</sub> Disagree    <input type="checkbox"/><sub>3</sub> Don't know    <input type="checkbox"/><sub>4</sub> Agree    <input type="checkbox"/><sub>5</sub> Strongly Agree</div> |  |  |  |  |
| <b>6. Which questionnaire best described your experience?</b><br><div><input type="checkbox"/><sub>1</sub> Fear of Cancer Recurrence Inventory – Short Form (FCRI-SF)<br/>(first questionnaire)    <input type="checkbox"/><sub>2</sub> Fear of Progression Questionnaire – Short Form (FoP-Q-SF)<br/>(second questionnaire)</div>                                       |  |  |  |  |
| <b>7. How important do you think it is to screen for fear of cancer returning or progressing?<br/>When do you think is the best time to screen for fear of cancer returning or progressing?</b><br>_____<br>_____                                                                                                                                                        |  |  |  |  |

Please add any additional comments or feedback about the *Fear-Less* Program's screening questionnaires.

---

---

Thank you for participating in this survey.

# THE PATIENT EXPERIENCE SURVEY

## FEAR-LESS POST SELF-MANAGEMENT INTERVENTION

Thank you for agreeing to participate in this survey about the 'Fear-Less' Program. You have been asked to complete this survey because you have completed the program's screening questionnaires, received the self-management intervention. When you see the term 'self-management intervention' we mean the booklet and the follow up phone calls you received.

This survey is about your experiences with the self-management intervention. The survey may take up to 10 minutes of your time. Your responses are confidential, and you are free to withdraw from the survey at any stage.

**Date:** \_\_\_\_/\_\_\_\_/\_\_\_\_

**1. Prior to this program, has anyone ever discussed fear of cancer returning or progressing with you?**

☐ <sub>0</sub> No

☐ <sub>1</sub> Yes

If yes, please tell us who discussed this with you and what happened next?

**2. Prior to this program, have you previously received information, treatment or support to improve your fear of cancer returning or progressing?**

☐ <sub>0</sub> No (proceed to Question 4)

☐ <sub>1</sub> Yes (please complete Q3a and 3b)

**2a. Please specify the type of support you received for your fear:**

☐ <sub>0</sub> Psychological treatment

☐ <sub>1</sub> Medical treatment

☐ <sub>2</sub> Professional advice. Explain \_\_\_\_\_

☐ <sub>3</sub> Information or fact sheets

☐ <sub>4</sub> Other: \_\_\_\_\_

**2b. Please specify who recommended this support**

☐ <sub>0</sub> I sought it myself

☐ <sub>1</sub> My medical team (e.g., oncologist; doctors; nurses)

☐ <sub>2</sub> My friends or family

☐ <sub>3</sub> Other: \_\_\_\_\_

**3. What has stopped you from seeking help for your fear of cancer returning or progressing in the past?**

- ☐<sub>0</sub> I did not have the time
- ☐<sub>1</sub> I was embarrassed about seeking help
- ☐<sub>2</sub> I did not know what to expect from the help or support
- ☐<sub>3</sub> I was worried I would feel more upset or anxious
- ☐<sub>4</sub> I felt that I had enough support from elsewhere
- ☐<sub>5</sub> I thought that I did not need help
- ☐<sub>6</sub> Other: \_\_\_\_\_

**4. Thinking about the 'Fear-Less' Program self-management intervention you have just received, please rate the amount of the booklet that you have read:**

- ☐<sub>0</sub> 0% of the booklet (none)      ☐<sub>1</sub> 25% of the booklet      ☐<sub>2</sub> 50% of the booklet      ☐<sub>3</sub> 75% of the booklet      ☐<sub>4</sub> 100% of the booklet

**5. How many exercises in the booklet did you complete?** (i.e., Finding Your Values; Setting Goals; Relaxation Diary ; Getting To Know Your Triggers; Thought Diary; Looking at Your Control; Your Plan To Manage Fear)

- ☐<sub>0</sub> 0      ☐<sub>1</sub> 1      ☐<sub>2</sub> 2      ☐<sub>3</sub> 3      ☐<sub>4</sub> 4      ☐<sub>5</sub> 5      ☐<sub>6</sub> 6      ☐<sub>7</sub> 7

**6. Which of the exercises in the booklet were most helpful?** (You can tick more than one)

- ☐<sub>1</sub> Finding Your Values
- ☐<sub>2</sub> Setting Goals
- ☐<sub>3</sub> Relaxation diary
- ☐<sub>4</sub> Getting To Know Your Triggers
- ☐<sub>5</sub> Thought Diary
- ☐<sub>6</sub> Looking At Your Control
- ☐<sub>7</sub> Your Plan To Manage Fear
- ☐<sub>6</sub> Other (please specify) \_\_\_\_\_

**7. Thinking about the 'Fear-Less' Program self-management intervention you have just received, what aspects of your care were most useful and helpful?**

---

---

---

**8. Thinking about the 'Fear-Less' Program self-management intervention you have just received, what aspects of your care were least useful and helpful?**

---

\_\_\_\_\_

\_\_\_\_\_

**9. Which of the following best describes any change in your fear of cancer returning or progressing since receiving the 'Fear-Less' self-management intervention? (please tick)**

- ☐<sub>1</sub> My fear is much worse
- ☐<sub>2</sub> My fear is somewhat worse
- ☐<sub>3</sub> My fear has not changed
- ☐<sub>4</sub> My fear is somewhat better
- ☐<sub>5</sub> My fear is much better

**10. To what extent do you think the changes in your fear are related to your self-management intervention?**

- |                                       |                                       |                                       |
|---------------------------------------|---------------------------------------|---------------------------------------|
| <input type="checkbox"/> <sub>1</sub> | <input type="checkbox"/> <sub>2</sub> | <input type="checkbox"/> <sub>3</sub> |
| <b>Not at all related</b>             | <b>Partly related</b>                 | <b>Completely related</b>             |

**11. What is your preferred way of receiving the *Fear-Less* follow-up care for fear of cancer returning or progressing? (Please tick)**

- ☐<sub>1</sub> Telephone
- ☐<sub>2</sub> Video-conferencing
- ☐<sub>3</sub> Face-to-face by myself (one on one with a clinician)
- ☐<sub>4</sub> Face-to face in a group
- ☐<sub>5</sub> Online
- ☐<sub>6</sub> Paper based resource/information

**12. Would you recommend the *Fear-Less* program to other patients with cancer?**

- |                                       |                                       |                                       |
|---------------------------------------|---------------------------------------|---------------------------------------|
| <input type="checkbox"/> <sub>1</sub> | <input type="checkbox"/> <sub>2</sub> | <input type="checkbox"/> <sub>3</sub> |
| <b>Yes</b>                            | <b>Don't know</b>                     | <b>No</b>                             |

**13. What are your suggestions about how we can improve the 'Fear-Less' Program or the intervention you received?**

\_\_\_\_\_

\_\_\_\_\_

\_\_\_\_\_

\_\_\_\_\_

**Thank you for participating in the survey.**

# THE PATIENT EXPERIENCE SURVEY

## FEAR-LESS POST CONQUER FEAR INTERVENTION

Thank you for agreeing to participate in this survey about the 'Fear-Less' Program. You have been asked to complete this survey because you have completed the program's screening questionnaires, received a referral for the *Conquer Fear* psychology intervention and have completed that follow-up care.

This survey is about your experiences with the *Conquer Fear* psychology intervention. The survey may take up to 10 minutes of your time. Your responses are confidential, and you are free to withdraw from the survey at any stage.

**Date:** \_\_\_\_/\_\_\_\_/\_\_\_\_

**1. Prior to this program, has anyone ever discussed fear of cancer returning or progressing with you?**

☐ No

☐ Yes

If yes, please tell us who discussed this with you and what happened next?

**2. Prior to this program, have you previously received information, treatment or support to improve your fear of cancer returning or progressing?**

☐ No (proceed to Question 4)

☐ Yes (please complete Q3a and 3b)

**2a. Please specify the type of support you received for your fear:**

☐ Psychological treatment

☐ Medical treatment

☐ Professional advice. Explain \_\_\_\_\_

☐ Information or fact sheets

☐ Other: \_\_\_\_\_

**2b. Please specify who recommended this support**

☐ I sought it myself

☐ My medical team (e.g., oncologist; doctors; nurses)

☐ My friends or family

☐ Other: \_\_\_\_\_

**3. What has stopped you from seeking help for your fear of cancer returning or progressing in the past?**

- ☐<sub>0</sub> I did not have the time
- ☐<sub>1</sub> I was embarrassed about seeking help
- ☐<sub>2</sub> I did not know what to expect from the help or support
- ☐<sub>3</sub> I was worried I would feel more upset or anxious
- ☐<sub>4</sub> I felt that I had enough support from elsewhere
- ☐<sub>5</sub> I thought that I did not need help
- ☐<sub>6</sub> Other: \_\_\_\_\_

**4. Thinking about the 'Fear-Less' Program *Conquer Fear* psychology intervention you have just received, what aspects of your care were most useful and helpful?**

---

---

---

**5. Thinking about the 'Fear-Less' Program *Conquer Fear* psychology intervention you have just received, what aspects of your care were least useful and helpful?**

---

---

---

**6. Which of the following best describes any change in your fear of cancer returning or progressing since receiving your *Conquer Fear* psychology intervention in the 'Fear-Less' Program? (please tick)**

- ☐<sub>1</sub> My fear is much worse
- ☐<sub>2</sub> My fear is somewhat worse
- ☐<sub>3</sub> My fear has not changed
- ☐<sub>4</sub> My fear is somewhat better
- ☐<sub>5</sub> My fear is much better

**7. To what extent do you think the changes in your fear are related to your *Conquer Fear* psychology intervention?**

☐<sub>1</sub>  
Not at all related

☐<sub>2</sub>  
Partly related

☐<sub>3</sub>  
Completely related

**8. What is your preferred way of receiving the *Conquer Fear* psychology intervention for fear of cancer returning or progressing? (Please tick)**

- ☐ <sub>1</sub> Telephone
- ☐ <sub>2</sub> Video-conferencing
- ☐ <sub>3</sub> Face-to-face by myself (one on one with a clinician)
- ☐ <sub>4</sub> Face-to face in a group
- ☐ <sub>5</sub> Online
- ☐ <sub>6</sub> Paper based resource/information

**9. Would you recommend the *Fear-Less* program to other patients with cancer?**

☐ <sub>1</sub>

**Yes**

☐ <sub>2</sub>

**Don't know**

☐ <sub>3</sub>

**No**

**10. What are your suggestions about how we can improve the '*Fear-Less*' Program or the psychology intervention you received?**

---

---

---

---

**Thank you for participating in the survey.**
